# Supplementary material for: Epigenetic Gene-Regulatory Loci in Alu Elements Associated with Autism Susceptibility in the Prefrontal Cortex of ASD
Source: MDPI journal article supplement (doi:10.3390/ijms24087518), 2023-04-19

**Figure S3** Consensus sequences and conserve scores of DE-AluY and nonDE-AluY. This figure showed the consensus sequence of AluY subfamily at the left arm of elements (containing the promoter region).

DE-AluY: 742 sequences

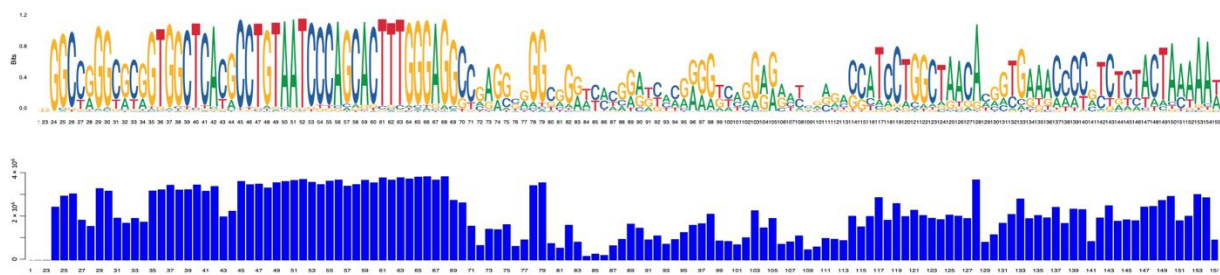

nonDE-AluY: 742 sequences

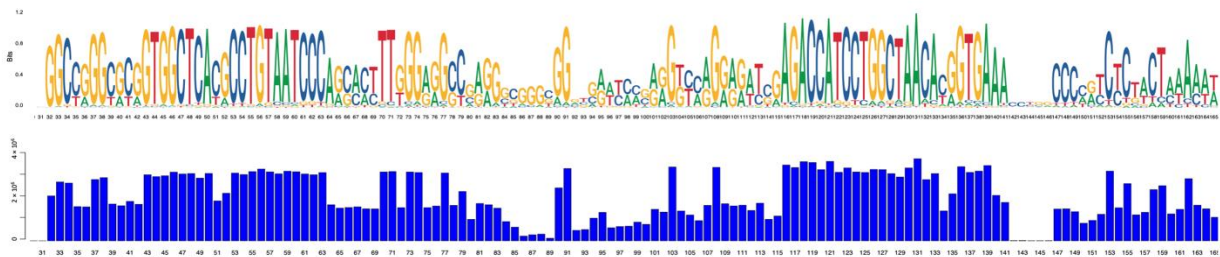

Supplement: s1 [file s1]
