# Supplementary material for: Epigenetic Gene-Regulatory Loci in Alu Elements Associated with Autism Susceptibility in the Prefrontal Cortex of ASD
Source: MDPI journal article supplement (doi:10.3390/ijms24087518), 2023-04-19

**Figure S1** Venn diagram of significantly correlated Alu loci in trans-regulation between ASD and unaffected control.

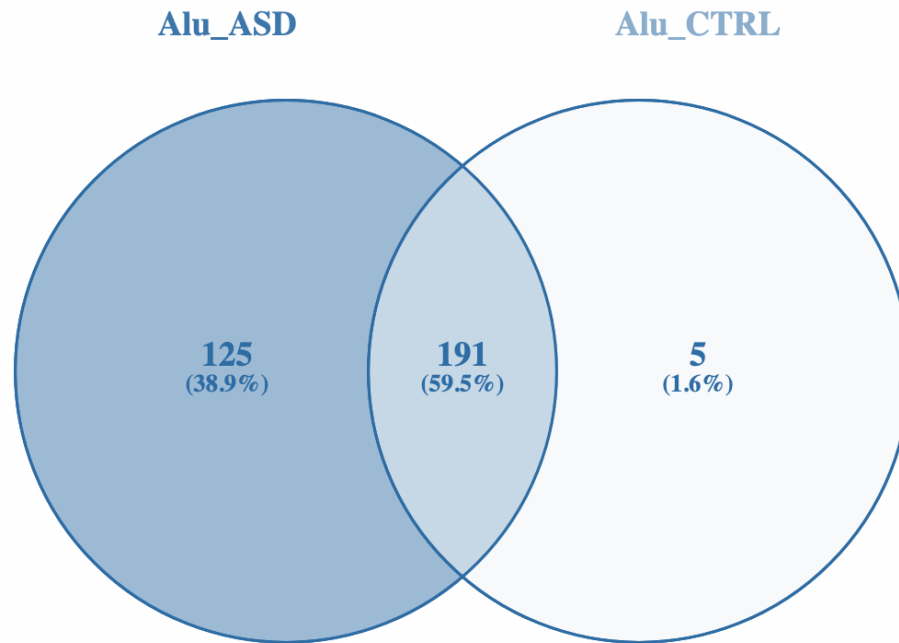

Supplement: s1 [file s1]
