# Supplementary material for: Epigenetic Gene-Regulatory Loci in Alu Elements Associated with Autism Susceptibility in the Prefrontal Cortex of ASD
Source: MDPI journal article supplement (doi:10.3390/ijms24087518), 2023-04-19
Supplement: s1 [file s1]

**Table S8.** Locus-specific methylation of Alu elements located within/nearby host DEGs in the prefrontal cortex tissues of ASD and unaffected individuals.

| DETEs  | Host DEGs     | Group          | % CpG no1 | % CpG no2    | % CpG no3 | % <sup>m</sup> C | % <sup>m</sup> C <sup>m</sup> C | % <sup>m</sup> C <sup>u</sup> C | % <sup>u</sup> C <sup>m</sup> C | % <sup>u</sup> C <sup>u</sup> C |
|--------|---------------|----------------|-----------|--------------|-----------|------------------|---------------------------------|---------------------------------|---------------------------------|---------------------------------|
| AluYk3 | <i>RNF135</i> | CTRL           | 90.96     | 90.17        | 70.73     | 95.70            | 60.41                           | 37.08                           | 1.23                            | 1.28                            |
|        |               | ASD            | 89.68     | 88.88        | 70.29     | 94.83            | 60.26                           | 36.75                           | 1.27                            | 1.72                            |
|        |               | <i>p</i> value | 0.525     | 0.661        | 0.847     | 0.514            | 0.943                           | 0.860                           | 0.878                           | 0.391                           |
|        |               | CTRL           | 92.07     | 91.87        | 69.31     | 96.21            | 61.81                           | 35.94                           | 1.03                            | 1.22                            |
|        |               | NV-ASD         | 89.06     | 85.08        | 71.13     | 93.30            | 58.46                           | 37.61                           | 1.88                            | 2.05                            |
|        |               | <i>p</i> value | 0.341     | <b>0.033</b> | 0.490     | 0.072            | 0.150                           | 0.418                           | <b>0.013</b>                    | 0.219                           |
|        |               | CTRL           | 91.54     | 89.93        | 71.10     | 95.87            | 60.30                           | 37.24                           | 1.36                            | 1.10                            |
|        |               | V-ASD          | 90.30     | 93.46        | 68.33     | 96.63            | 62.90                           | 35.00                           | 0.87                            | 1.24                            |
|        |               | <i>p</i> value | 0.739     | 0.380        | 0.478     | 0.653            | 0.455                           | 0.501                           | 0.229                           | 0.819                           |
| AluSz6 | <i>GRIN2A</i> | CTRL           | 83.04     | 58.87        | -         | 77.33            | 52.33                           | 39.71                           | 4.73                            | 3.22                            |
|        |               | ASD            | 83.30     | 69.03        | -         | 83.86            | 65.20                           | 29.31                           | 2.96                            | 2.53                            |
|        |               | <i>p</i> value | 0.946     | 0.122        | -         | 0.059            | 0.051                           | 0.094                           | 0.189                           | 0.519                           |
|        |               | CTRL           | 83.52     | 59.63        | -         | 78.40            | 53.11                           | 39.19                           | 4.75                            | 2.96                            |
|        |               | NV-ASD         | 84.86     | 64.15        | -         | 81.35            | 59.69                           | 34.49                           | 2.90                            | 2.92                            |
|        |               | <i>p</i> value | 0.816     | 0.603        | -         | 0.528            | 0.434                           | 0.573                           | 0.384                           | 0.984                           |
|        |               | CTRL           | 80.60     | 60.53        | -         | 77.80            | 52.65                           | 38.45                           | 6.09                            | 2.82                            |
|        |               | V-ASD          | 81.74     | 73.91        | -         | 86.37            | 70.71                           | 24.14                           | 3.02                            | 2.13                            |
|        |               | <i>p</i> value | 0.865     | 0.246        | -         | 0.152            | 0.116                           | 0.172                           | 0.196                           | 0.662                           |
| AluSg7 | <i>HMOX1</i>  | CTRL           | 96.72     | -            | -         | -                | -                               | -                               | -                               | -                               |
|        |               | ASD            | 96.93     | -            | -         | -                | -                               | -                               | -                               | -                               |
|        |               | <i>p</i> value | 0.724     | -            | -         | -                | -                               | -                               | -                               | -                               |
|        |               | CTRL           | 96.69     | -            | -         | -                | -                               | -                               | -                               | -                               |
|        |               | NV-ASD         | 97.11     | -            | -         | -                | -                               | -                               | -                               | -                               |
|        |               | <i>p</i> value | 0.651     | -            | -         | -                | -                               | -                               | -                               | -                               |
|        |               | CTRL           | 96.21     | -            | -         | -                | -                               | -                               | -                               | -                               |
|        |               | V-ASD          | 96.68     | -            | -         | -                | -                               | -                               | -                               | -                               |
|        |               | <i>p</i> value | 0.596     | -            | -         | -                | -                               | -                               | -                               | -                               |
