# Supplementary material for: Epigenetic Gene-Regulatory Loci in Alu Elements Associated with Autism Susceptibility in the Prefrontal Cortex of ASD
Source: MDPI journal article supplement (doi:10.3390/ijms24087518), 2023-04-19
Supplement: s1 [file s1]

**Figure S2a Hypergeometric distribution analysis.** (a) Overlapping between DEGs correlated with DETEs in ASD individuals and SFARI genes. (b) Overlapping between all DEGs in ASD individuals and SFARI genes.

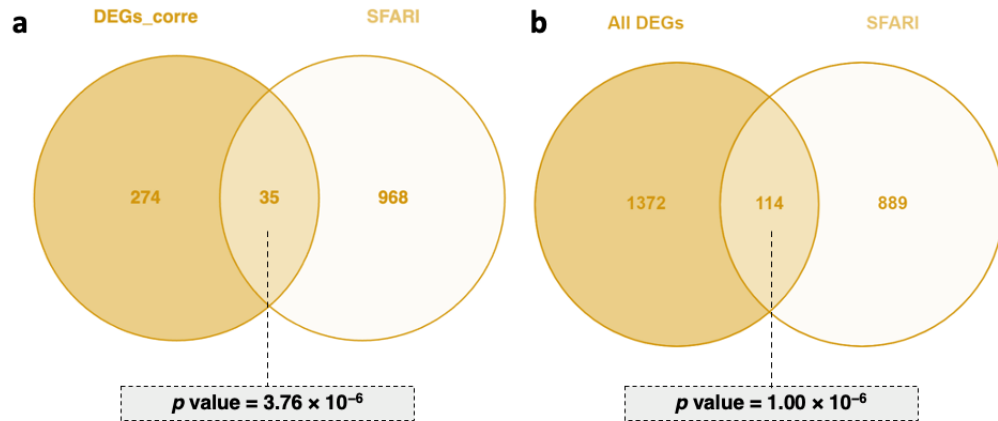

**Figure S2b.** List of overlapping genes between correlated DEGs classified by Alu location and autism candidate genes from the SFARI database.

| Overlapping                         | #DEGs | List of overlapping DEGs                                                                                                                                                                 |
|-------------------------------------|-------|------------------------------------------------------------------------------------------------------------------------------------------------------------------------------------------|
| SFARI versus DEGs-Alu within intron | 24    | <i>BAZ2B, BCAS1, CNTNAP2, CSMD1, DOCK1, GABBR2, GABRG3, GRIN2A, GRIN2B, KANK1, MYH10, MYO9B, NBEA, NRXN3, PCDH19, PCDHA1, PCDHA3, PCDHA4, PCDHA5, PCDHA6, PTPRT, RNF135, UNC5D, XPO1</i> |
| SFARI versus DEGs-Alu within 50kb   | 14    | <i>EGR3, GATM, GRIN2B, MEF2C, MYO9B, NFIX, PCDHA11, PCDHA12, RNF135, STXBP1, VAMP2, UNC5D, XPO1, YWHAG</i>                                                                               |
| SFARI versus DEGs-Alu within exon   | 3     | <i>DAPPI, KCNB1, RNF135</i>                                                                                                                                                              |
