# Supplementary material for: Epigenetic Gene-Regulatory Loci in Alu Elements Associated with Autism Susceptibility in the Prefrontal Cortex of ASD
Source: MDPI journal article supplement (doi:10.3390/ijms24087518), 2023-04-19
Supplement: s1 [file s1]

**Table S6.** Canonical pathways of the DEGs correlated with DETEs and DE-Alu in the prefrontal cortex of ASD predicted by IPA.

| Ingenuity Canonical Pathways                                    | DETEs                 | DE-Alu                |                                                                            |
|-----------------------------------------------------------------|-----------------------|-----------------------|----------------------------------------------------------------------------|
|                                                                 | <i>p</i> value        | <i>p</i> value        | Molecules                                                                  |
| Synaptogenesis Signaling Pathway                                | $7.08 \times 10^{-5}$ | $8.91 \times 10^{-5}$ | <i>ARPC1B, CDH12, CDH18, CNTNAP2, GRIN2A, GRIN2B, STXBP1, SYT13, VAMP2</i> |
| Calcium Signaling                                               | $7.76 \times 10^{-5}$ | $3.55 \times 10^{-2}$ | <i>CAMK1D, GRIN2A, GRIN2B, TRPC5</i>                                       |
| Fcy Receptor-mediated Phagocytosis in Macrophages and Monocytes | $8.13 \times 10^{-5}$ | $2.29 \times 10^{-3}$ | <i>ARPC1B, DOCK1, GPLD1, HMOX1</i>                                         |
| Neuroinflammation Signaling Pathway                             | $2.34 \times 10^{-4}$ | $2.29 \times 10^{-3}$ | <i>CFLAR, GRIN2A, GRIN2B, HMOX1, IL18, TGFB3, TYROBP</i>                   |
| Ephrin Receptor Signaling                                       | $3.31 \times 10^{-3}$ | $3.09 \times 10^{-2}$ | <i>ARPC1B, GNG5, GRIN2A, GRIN2B</i>                                        |
| Reelin Signaling in Neurons                                     | $1.17 \times 10^{-2}$ | $3.80 \times 10^{-2}$ | <i>ARPC1B, GRIN2A, GRIN2B</i>                                              |
| Glutamate Receptor Signaling                                    | $1.66 \times 10^{-2}$ | $6.76 \times 10^{-3}$ | <i>GNG5, GRIN2A, GRIN2B</i>                                                |
| Axonal Guidance Signaling                                       | $1.66 \times 10^{-2}$ | $1.63 \times 10^{-1}$ | <i>ARPC1B, DOCK1, GNG5, SLIT2, UNC5D</i>                                   |
| Choline Biosynthesis III                                        | $1.82 \times 10^{-2}$ | $3.02 \times 10^{-3}$ | <i>GPLD1, HMOX1</i>                                                        |
| nNOS Signaling in Neurons                                       | $3.16 \times 10^{-2}$ | $3.02 \times 10^{-2}$ | <i>GRIN2A, GRIN2B</i>                                                      |
| Cell Cycle: G2/M DNA Damage Checkpoint Regulation               | $3.98 \times 10^{-2}$ | $3.24 \times 10^{-3}$ | <i>BRCA1, CHEK2, MDM4</i>                                                  |
