# Supplementary material for: Epigenetic Gene-Regulatory Loci in Alu Elements Associated with Autism Susceptibility in the Prefrontal Cortex of ASD
Source: MDPI journal article supplement (doi:10.3390/ijms24087518), 2023-04-19
Supplement: s1 [file s1]

**Table S1.** Details of the transcriptome data using post-mortem brain tissues of ASD and unaffected individuals obtained from GEO DataSets.

| Data type    | GSE number | Author                  | Sample type                      | Sample size     | Titles                                                                                   | Notes                 |
|--------------|------------|-------------------------|----------------------------------|-----------------|------------------------------------------------------------------------------------------|-----------------------|
| RNA-seq data | GSE59288   | Liu et al. (2016)       | Prefrontal cortex                | ASD=34, Ctrl=38 | Disruption of an Evolutionarily Novel Synaptic Expression Pattern in Autism              | RNA-seq RAW data      |
|              | GSE102741  | Wright et al. (2017)    | Prefrontal cortex                | ASD=13, Ctrl=39 | Altered expression of histamine signaling genes in autism spectrum disorder.             | RNA-seq RAW data      |
|              | GSE64018   | Parikshak et al. (2014) | Prefrontal cortex and cerebellum | ASD=12, Ctrl=12 | Genome-wide changes in lncRNA, splicing, and regional gene expression patterns in autism | no available RAW data |
|              | GSE30573   | Voineagu et al. (2011)  | Prefrontal cortex                | ASD=3, Ctrl=3   | Transcriptomic analysis of autistic brain reveals convergent molecular pathology         | RNA-seq RAW data      |
