# Supplementary material for: Epigenetic Gene-Regulatory Loci in Alu Elements Associated with Autism Susceptibility in the Prefrontal Cortex of ASD
Source: MDPI journal article supplement (doi:10.3390/ijms24087518), 2023-04-19
Supplement: s1 [file s1]

**Table S7.** List of the unique ASD-associated transcription factors which bonded at the DE-AluS consensus sequence predicted by the JASPAR CORE and overlapped with the SFARI database.

| Matrix ID | Symbol | Score   | Relative score | Sequence ID | Start | End | Strand | Predicted sequence |
|-----------|--------|---------|----------------|-------------|-------|-----|--------|--------------------|
| MA0017.2  | NR2F1  | 12.2558 | 0.91535        | DEAluS      | 7     | 19  | +      | TTGAGGTCAGGAG      |
| MA0693.2  | VDR    | 8.61672 | 0.90919        | DEAluS      | 16    | 23  | +      | GGAGTTCA           |
| MA0160.1  | NR4A2  | 8.84519 | 0.90185        | DEAluS      | 9     | 16  | +      | GAGGTCAG           |
| MA0693.2  | VDR    | 8.27478 | 0.89944        | DEAluS      | 8     | 15  | +      | TGAGGTCA           |
| MA1531.1  | NR1D1  | 10.4393 | 0.87418        | DEAluS      | 10    | 24  | +      | AGGTCAGGAGTTCAA    |
| MA0071.1  | RORA   | 8.90167 | 0.84916        | DEAluS      | 6     | 15  | +      | CTTGAGGTCA         |
| MA1963.1  | SATB1  | 6.78882 | 0.82693        | DEAluS      | 55    | 67  | +      | TCTCTACTAAAAA      |
| MA1464.1  | ARNT2  | 4.32459 | 0.82595        | DEAluS      | 2     | 11  | +      | ATCACTTGAG         |
| MA0160.1  | NR4A2  | 6.52681 | 0.82039        | DEAluS      | 23    | 30  | +      | AAGACCAG           |
| MA0007.2  | AR     | 5.42626 | 0.81533        | DEAluS      | 23    | 37  | +      | AAGACCAGCCTGGCC    |
| MA0523.1  | TCF7L2 | 4.52663 | 0.805          | DEAluS      | 16    | 29  | +      | GGAGTTCAAGACCA     |
| MA0160.2  | NR4A2  | 6.03833 | 0.80399        | DEAluS      | 6     | 15  | +      | CTTGAGGTCA         |
