# Supplementary material for: Epigenetic Gene-Regulatory Loci in Alu Elements Associated with Autism Susceptibility in the Prefrontal Cortex of ASD
Source: MDPI journal article supplement (doi:10.3390/ijms24087518), 2023-04-19
Supplement: s1 [file s1]

**Table S5.** Diseases and functions of the DEGs correlated with DETEs and DE-Alu in the prefrontal cortex of ASD predicted by IPA.

| Diseases or Functions<br>Annotation                 | DETEs                         | DE-Alu                        |                                                                                                                                                                                                                     |
|-----------------------------------------------------|-------------------------------|-------------------------------|---------------------------------------------------------------------------------------------------------------------------------------------------------------------------------------------------------------------|
|                                                     | <i>p</i> value<br>(#genes)    | <i>p</i> value<br>(#genes)    | DEGs lists                                                                                                                                                                                                          |
| Pervasive developmental disorder                    | $1.04 \times 10^{-7}$<br>(21) | $6.97 \times 10^{-5}$<br>(9)  | <i>CNTNAP2, GNG5, GRIN2A, GRIN2B, IL18, RNF135, TSPO, USP3, VAMP2</i>                                                                                                                                               |
| Autism spectrum disorder or intellectual disability | $4.33 \times 10^{-5}$<br>(37) | $1.19 \times 10^{-3}$<br>(16) | <i>ATP8A2, CNTNAP2, GNG5, GRIN2A, GRIN2B, IL18, KCNB1, KCNQ5, NBEA, RNF135, SCN3B, STXBP1, TRPC5, TSPO, USP3, VAMP2</i>                                                                                             |
| Nonspecific mental retardation                      | $8.84 \times 10^{-5}$<br>(19) | $3.81 \times 10^{-3}$<br>(8)  | <i>CNTNAP2, GRIN2A, GRIN2B, KCNB1, KCNQ5, NBEA, STXBP1, TRPC5</i>                                                                                                                                                   |
| Seizures                                            | $5.29 \times 10^{-8}$<br>(25) | $1.80 \times 10^{-3}$<br>(9)  | <i>CNTNAP2, GRIN2A, GRIN2B, HMOX1, KCNB1, NBEA, SCN3B, STXBP1, TSPO</i>                                                                                                                                             |
| Movement Disorders                                  | $4.94 \times 10^{-7}$<br>(45) | $1.52 \times 10^{-3}$<br>(17) | <i>ATP8A2, CDH18, CFLAR, GRIN2A, GRIN2B, HMOX1, ID3, KCNB1, NBEA, NDRG3, NEDD4, RPH3A, SCN3B, SLIT2, SPP1, TSPO, VAMP2</i>                                                                                          |
| Epilepsy                                            | $6.94 \times 10^{-6}$<br>(22) | $8.46 \times 10^{-3}$<br>(8)  | <i>CNTNAP2, GRIN2A, GRIN2B, HMOX1, KCNB1, SCN3B, STXBP1, TSPO</i>                                                                                                                                                   |
| Disorder of basal ganglia                           | $9.62 \times 10^{-6}$<br>(35) | $2.12 \times 10^{-3}$<br>(14) | <i>CFLAR, GRIN2A, GRIN2B, HMOX1, ID3, NBEA, NDRG3, NEDD4, RPH3A, SCN3B, SLIT2, SPP1, TSPO, VAMP2</i>                                                                                                                |
| Multiple Sclerosis                                  | $1.00 \times 10^{-5}$<br>(17) | $6.05 \times 10^{-4}$<br>(8)  | <i>CFLAR, GRIN2A, GRIN2B, HAVCR2, KCNB1, MERTK, SPP1, TSPO</i>                                                                                                                                                      |
| Progressive neurological disorder                   | $1.70 \times 10^{-5}$<br>(49) | $6.02 \times 10^{-3}$<br>(19) | <i>APOC1, BRCA1, CFLAR, GRIN2A, GRIN2B, HAVCR2, HMOX1, KCNB1, MERTK, mir-612, MTHFD2, NEDD4, SCN3B, SLIT2, SPP1, STXBP1, TSPO, TYROBP, VAMP2</i>                                                                    |
| Huntington Disease                                  | $3.29 \times 10^{-5}$<br>(26) | $4.75 \times 10^{-4}$<br>(12) | <i>CFLAR, GRIN2A, GRIN2B, HMOX1, ID3, NBEA, NDRG3, RPH3A, SCN3B, SLIT2, TSPO, VAMP2</i>                                                                                                                             |
| Apoptosis                                           | $7.86 \times 10^{-6}$<br>(70) | $5.75 \times 10^{-4}$<br>(30) | <i>APOC1, BAZ1A, BNIP2, BRCA1, CARD8, CFLAR, CHEK2, GPLD1, GRIN2B, HMOX1, ID3, IFIT3, IKZF1, IL18, MDM4, MERTK, MOAP1, NEDD4, PARP14, PLIN2, PTK6, S100A11, SCN3B, SLIT2, SPAG5, SPP1, TCF12, TGFB3, XAF1, XPO1</i> |
